# Supplementary material
Source: PubMed Central journal article supplement (PMC9338025)
Supplement: 42003_2022_3700_MOESM1_ESM.pdf [file 42003_2022_3700_MOESM1_ESM.pdf]

Supplementary Information for

**Human antibodies to SARS-CoV-2 with a recurring YYDRxG motif retain binding and neutralization to variants of concern including Omicron**

Hejun Liu<sup>1,¶</sup>, Chengzi I. Kaku<sup>2,¶</sup>, Ge Song<sup>3,¶</sup>, Meng Yuan<sup>1</sup>, Raiees Andrabi<sup>3</sup>, Dennis R. Burton<sup>3,4</sup>,  
Laura M. Walker<sup>2,5,\*</sup>, Ian A. Wilson<sup>1,6,\*</sup>

<sup>1</sup> Department of Integrative Structural and Computational Biology, The Scripps Research Institute, La Jolla, CA 92037, USA

<sup>2</sup> Adimab, LLC, Lebanon, NH 03766, USA.

<sup>3</sup> Department of Immunology and Microbiology, The Scripps Research Institute, La Jolla, CA 92037, USA

<sup>4</sup> Ragon Institute of MGH, MIT and Harvard, Cambridge, MA 02139, USA

<sup>5</sup> Adagio Therapeutics, Inc., Waltham, MA 02451, USA

<sup>6</sup> The Skaggs Institute for Chemical Biology, The Scripps Research Institute, La Jolla, CA, 92037, USA

¶ These authors contributed equally

\* These authors jointly supervised this work

Correspondence: [wilson@scripps.edu](mailto:wilson@scripps.edu) (I.A.W.), [laura.walker@adimab.com](mailto:laura.walker@adimab.com) (L.M.W.)

**This PDF file includes:**

- **Supplementary Figures 1-7**
- **Supplementary Tables 1-3**

**Other Supplementary Information for this manuscript includes the following:**

- **Supplementary Data 1-2**

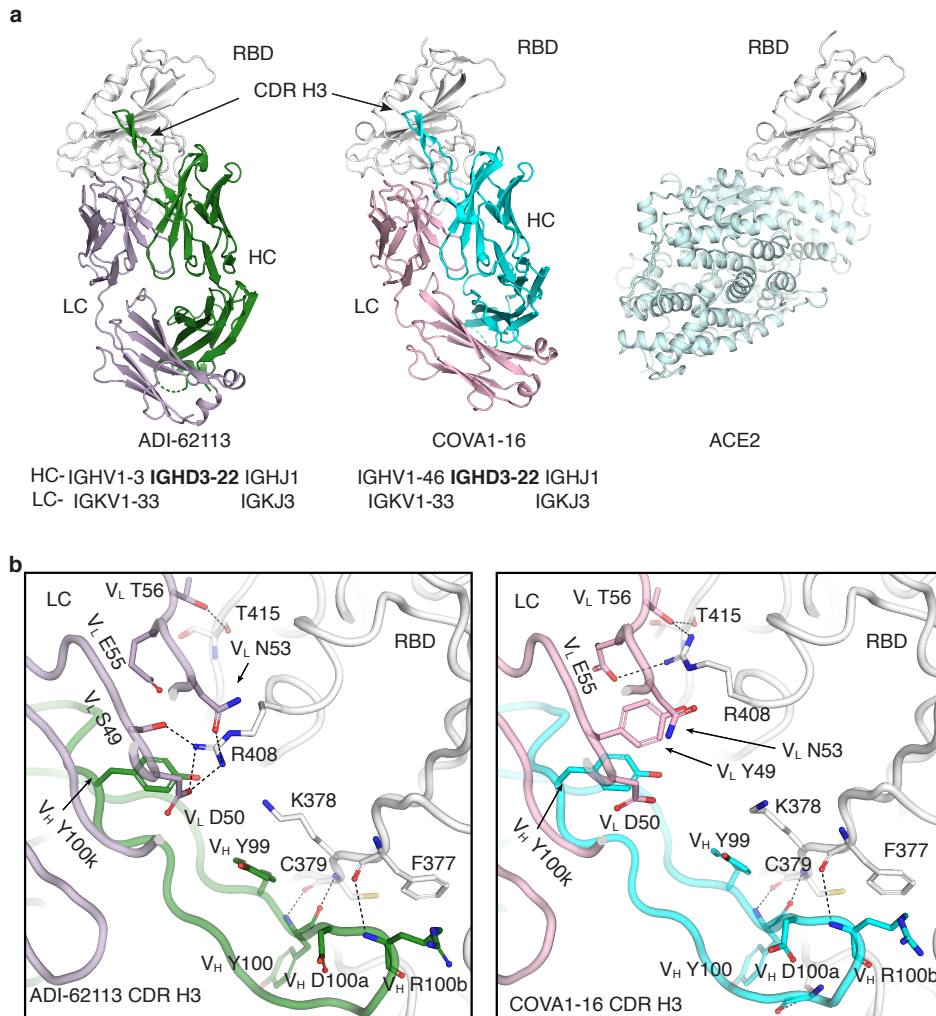

**Supplementary Figure 1. Structural comparison of ADI-62113 and COVA1-16.** **a**, A similar binding mode to SARS-CoV-2 RBD was found for ADI-62113 and COVA1-16. Structures are shown in ribbon representation. Both antibodies compete with ACE2 binding as shown in the far right even although their epitopes do not directly overlap with ACE2. SARS-CoV-2 RBD is shown in white. The same perspective view is used for all structures. The  $\beta$ -hairpin in CDR H3 is more twisted compared to the strands in the  $\beta$ -sheet in the core region of the Fab. Heavy chain (HC) and light chain (LC) immunoglobulin genes are shown under each antibody for comparison. Both antibodies use the *IGHD3-22* gene encoding the YYDRxG motif. **b**, Comparison between ADI-62113 and COVA1-16 Fab binding to SARS-CoV-2 RBD. ADI-62113 adopts a similar binding

mode to COVA1-16. A long CDR H3 containing the YYDRxG motif dominates the binding to SARS-CoV-2. Some differences in detailed interactions are seen due to sequence variation between the different antibodies, e.g., interaction with R408 of the RBD. The structures are shown in backbone tube representation with the side chains of residues involved in antibody-antigen interaction in sticks.

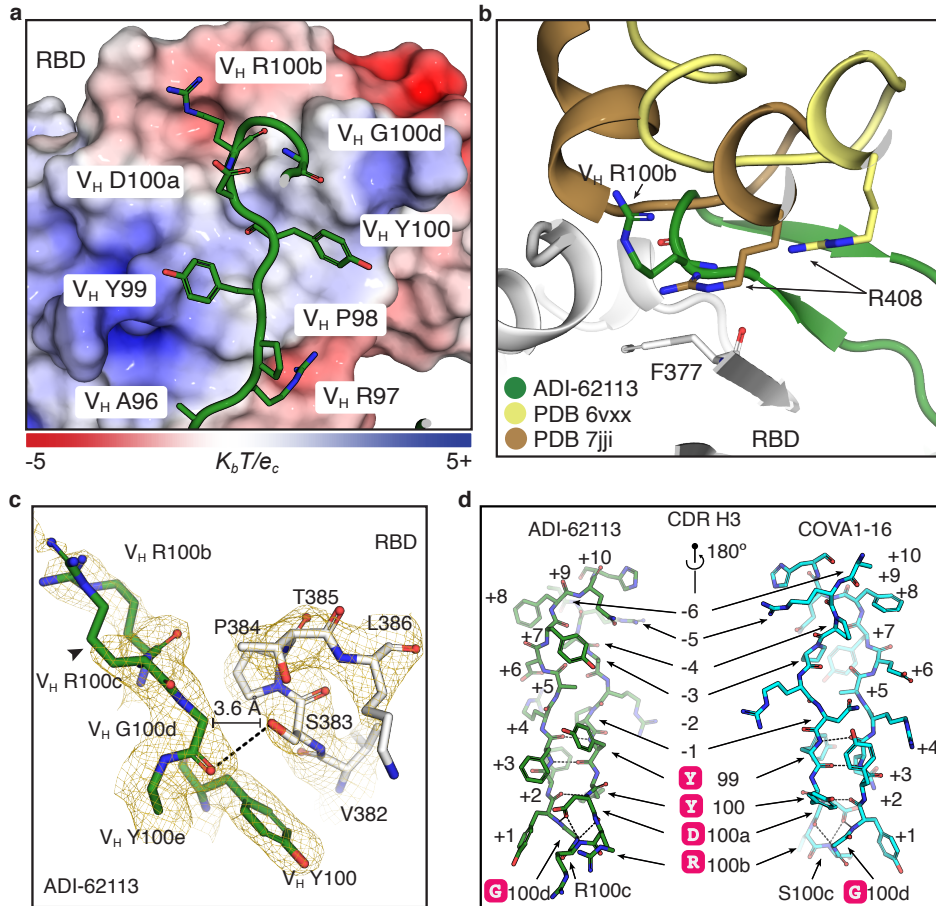

**Supplementary Figure 2. YYDRxG motif analysis.** **a**, CDR H3 of ADI-62113 bound to SARS-CoV-2 RBD surface. SARS-CoV-2 RBD is shown in an electrostatic surface representation. Red indicates a negatively charged surface and blue indicates a positively charged surface. The bar below the panel shows the electrostatic scale. CDR H3 is shown in a backbone tube representation with side chains in sticks. V<sub>H</sub> R100b binds to a recessed surface on the RBD with an overall negative charge. **b**, The conserved surface where V<sub>H</sub> R100b binds is also part of the interface between spike protomers when RBD is in the down conformation. Intra-protomer interaction among RBDs within a spike is variable due to slight differences among RBD conformations in different structures. Spikes with all RBD in “down” state are shown using two PDB IDs: 6VXX and 7JJI. R408 from the neighboring RBD can bind to the same site where V<sub>H</sub>



R100b in ADI-62113 and COVA1-16 binds. Interaction between an arginine and F377 also seems to be common for both intra-protomer binding and antibody recognition at this site. **c.** Electron density around ADI-62113 V<sub>H</sub> R100c. The electron density map is contoured at  $\sigma=1.0$  using a 2mFo-DFc map calculated from the structure factors using PHENIX program<sup>1</sup>. The V<sub>H</sub> R100c has poor to no side-chain density likely due to high mobility (indicated by an arrowhead). **d.** Comparison of the shared features of YYDRxG in ADI-62113 and COVA1-16. The hydrogen bonding observed with the YYDRxG hexapeptide is almost identical, indicating a conserved structure of the two CDR H3s. Sequences outside of YYDRxG are highly variable and two proline substitutions (at positions -3 and -4) have no impact on the YYDRxG conformation. The distance between YYDRxG to the first and last residue of CDR H3 seems important to position the hexapeptide at an appropriate distance at the tip of CDR H3 for RBD binding. A minimum of 5+ aa prior and 7+aa post YYDRxG hexapeptide should allow formation of a similar CDR H3 structure.

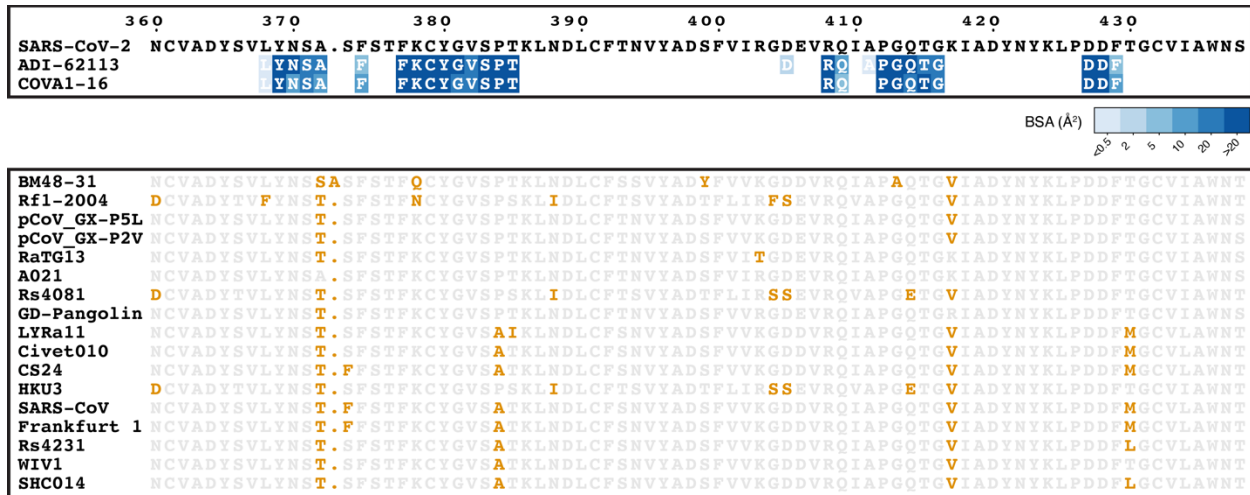

**Supplementary Figure 3. Conserved epitope residues of YYDRxG antibodies.** Epitope residues of ADI-62113 and COVA1-16, two YYDRxG antibodies, are highly conserved across sarbecoviruses. Epitope residues are highlighted on the sequence of SARS-CoV-2 RBD in the upper panel with blue tint indicating buried surface area (BSA). Epitope residues are defined by having the BSA by the indicated antibody larger than 0 Å<sup>2</sup>. Other representative sarbecovirus sequences are aligned in the lower panel. Conserved residues to SARS-CoV-2 are shown in light grey and variable in orange. RBD amino-acid sequences were retrieved from GenBank database with the following IDs: BM48-31, YP\_003858584; Rf1-2004, ABD75323; pCoV\_GX-P5L, QIA48632; pCoV\_GX-P2V, QIQ54048; RaTG13, QHR63300; SARS-CoV-2, YP\_009724390; A021, QWQ56573; Rs4081, ATO98120; GD-Pangolin, QLR06866; LYRa11, AHX37558; Civet010, AAU04649; CS24, ABF68959; HKU3, AAY88866; SARS-CoV, YP\_009825051; Frankfurt 1, AAP33697; Rs4231, ATO98157; WIV1, AGZ48828; SHC014, QJE50589. Alignment of all sarbecovirus RBDs are included in Supplementary Data 1.

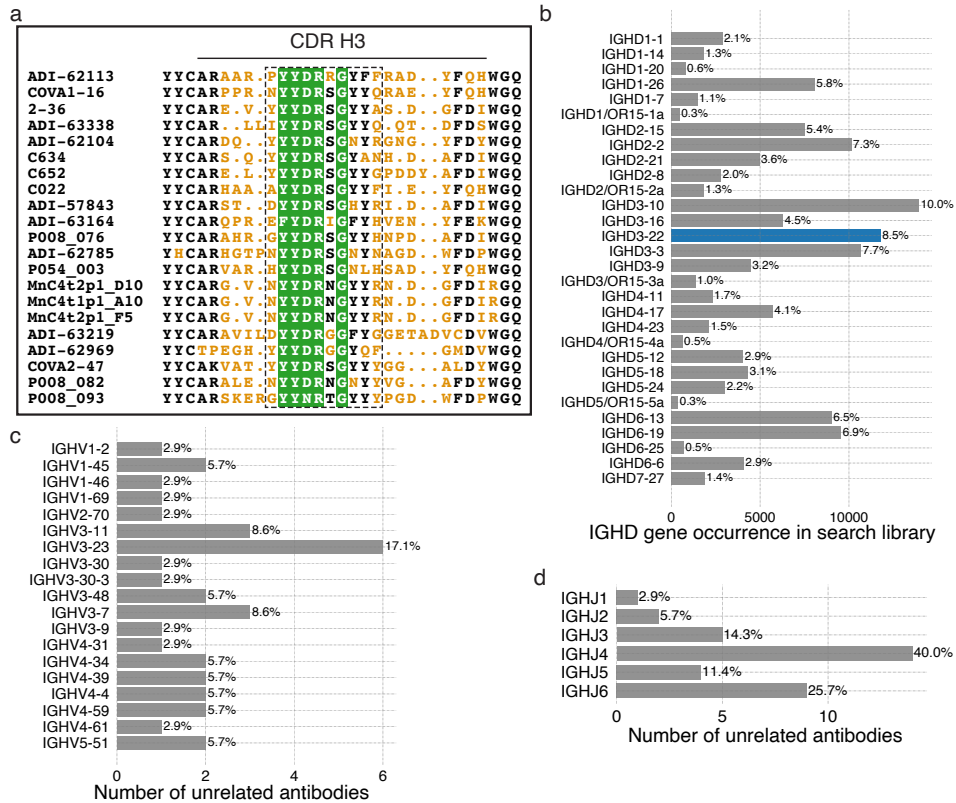

**Supplementary Figure 4. YYDRxG antibodies identified from publicly available sequences.**

**a**, CDR H3 sequence alignment of representative YYDRxG antibodies against SARS-CoV-2.

Conserved residues are shown in black and white, and variable residues in orange. Green background highlights key residues in the YYDRxG motif. CDR H3 sequences for all antibodies

are included in Supplementary Table 2 (tested against SARS-CoV-2) and Supplementary Table 3 (sequence only). CDR H3 regions (IMGT definition) are indicated by the solid line above the

sequences. Sequences encoded by *IGHD3-22* are boxed with a dashed line. **b**, Immunoglobulin

diversity (IGHD) genes in the computational search library compiled with publicly available

antibody sequences are described in Methods section. IGHD genes are diversely distributed in

the overall library. No single IGHD gene is dominant in the antibody sequences, although some

have higher propensity than others. *IGHD3-22* gene used to encode YYDRxG antibodies is

colored blue. **c-d**, Immunoglobulin variable (IGHV) and joining (IGHJ) genes in YYDRxG

antibodies isolated from non-COVID-19 cohorts. The diverse sets of IGHV and IGHJ genes are distinct from, but partially overlap with, those observed in anti-SARS-CoV-2 antibodies, as shown in Fig. 3d-e.

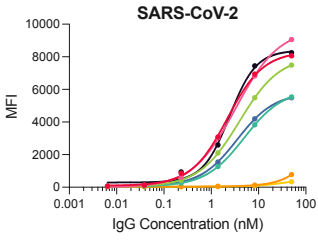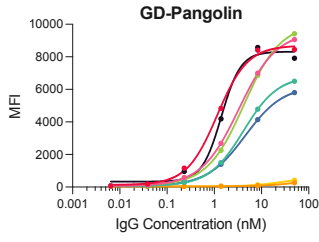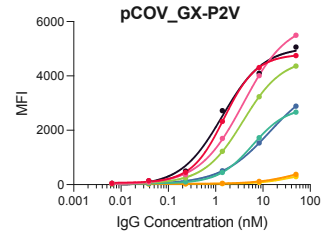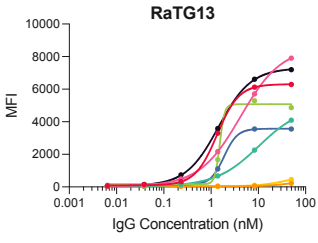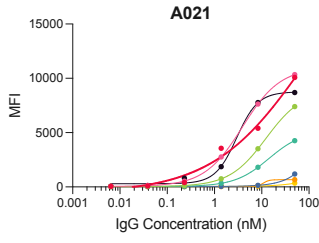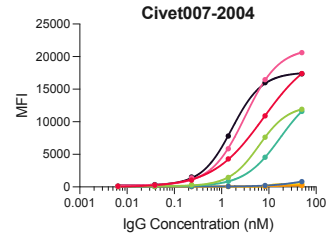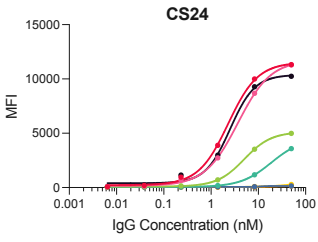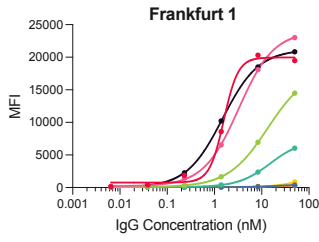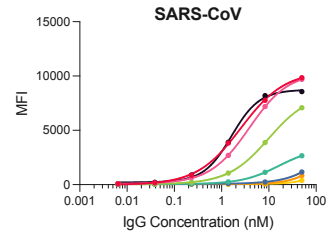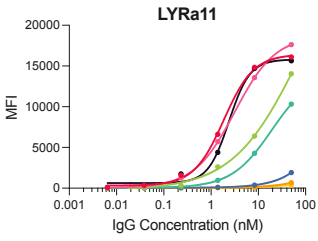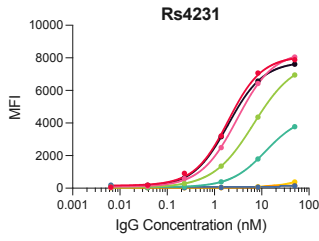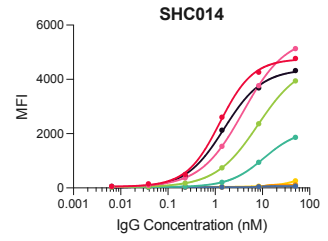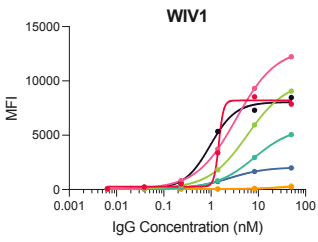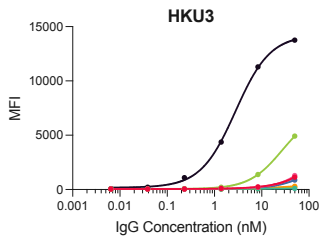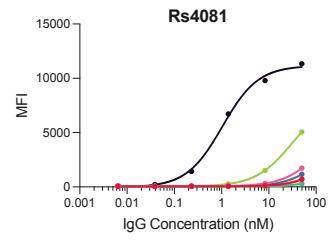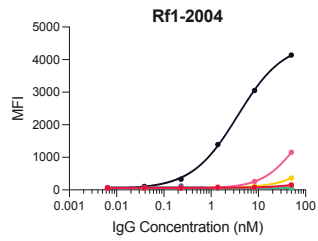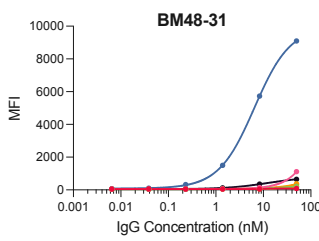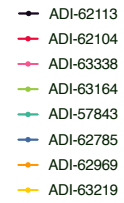

**Supplementary Figure 5. Cross-reactivity of YYDRxG antibodies with sarbecoviruses.** ADI antibodies were used for kinetic binding assay with sarbecovirus RBDs displayed on the yeast cell surface. Binding affinities are plotted as a heatmap in Fig. 5b. Most antibodies show potent binding to multiple sarbecoviruses, except for ADI-62969 and ADI-63219. The CDR H3 length of these two antibodies seems to be consistent with diminished binding to antigen.

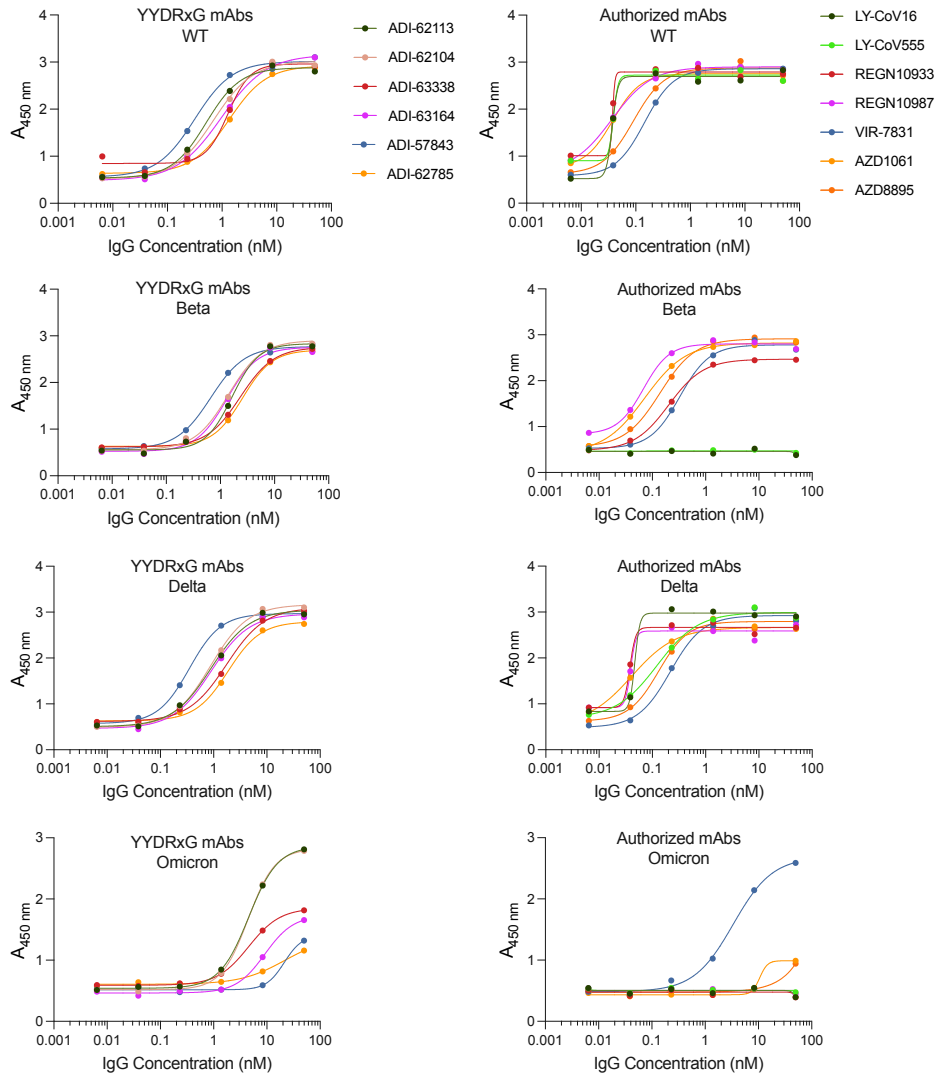

**Supplementary Figure 6. Binding of YYDRxG antibodies to VOC RBDs.** The Adimab YYDRxG antibodies generally retain their binding to more challenging variants, such as Omicron, Beta, and Delta, while almost all antibodies under emergency use authorization do not. The binding affinities, i.e.,  $K_D$ s, were determined in an enzyme-linked immunosorbent assay by titration of indicating antibodies.  $K_D$  changes compared to the ancestral strain (WT) are shown in Fig. 5c.

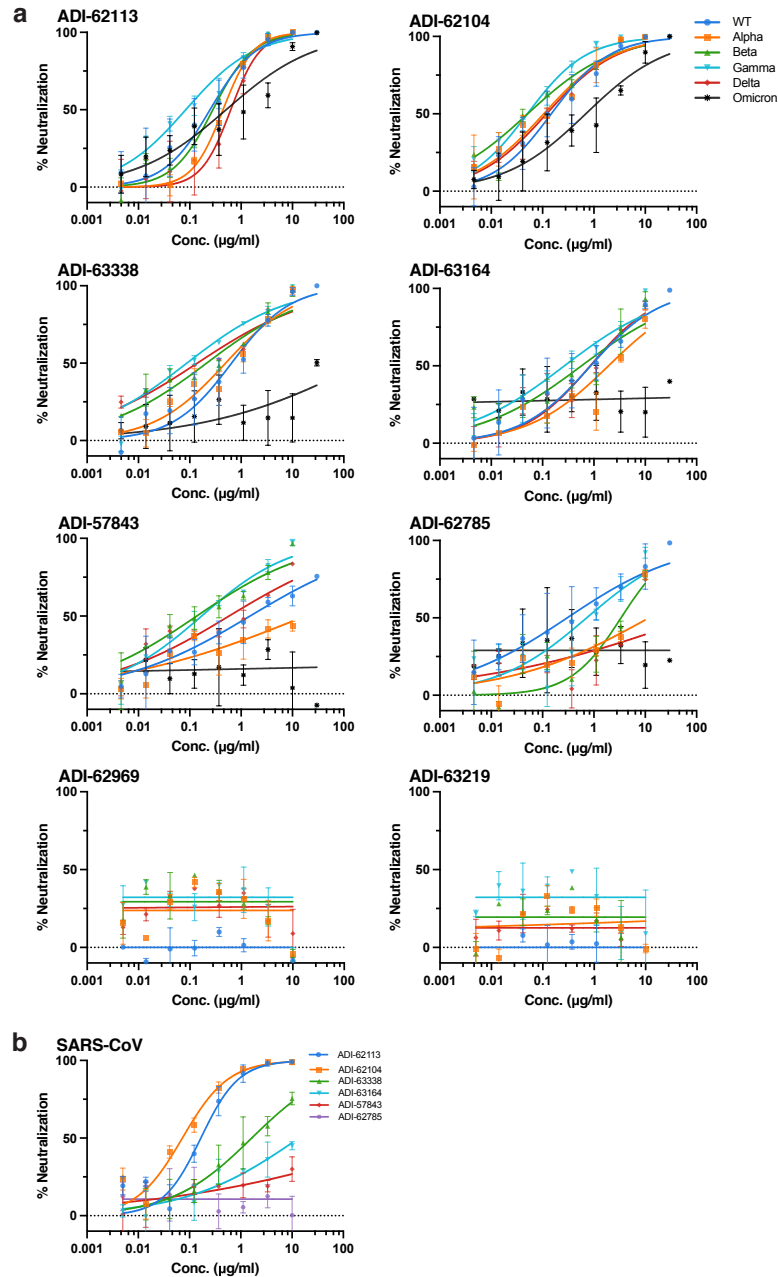

**Supplementary Figure 7. YYDRxG antibodies neutralize SARS-CoV-2 VOCs and SARS-CoV.**

ADI antibodies were tested in a neutralization assay against SARS-CoV-2 wild type (WT), all the VOCs including Omicron, and SARS-CoV pseudoviruses. Neutralization potencies,  $IC_{50}$ s, are shown in Fig. 5d. Consistent with the binding kinetics assay, most antibodies broadly neutralize



SARS-CoV-2 variants **(a)** and SARS-CoV **(b)**. Error bars indicate standard deviation (SD) of at least two biological replicates.

**Supplementary Table 1. YYDRxG antibodies against SARS-CoV-2 with available neutralization data.**

|    | Ab name      | Neut. | Cr.  | Epitope | CDR H3                    | Leng. | IGHV       | IGHD     | IGHJ  | IGK/LV    | PubMed ID |
|----|--------------|-------|------|---------|---------------------------|-------|------------|----------|-------|-----------|-----------|
| 1  | ADI-62113    | Yes*  | Yes* | RBD     | ARAARPYDRRGYFFRADYFQH     | 22    | IGHV1-3    | IGHD3-22 | IGHJ1 | IGKV1-33  | 33622975  |
| 2  | COVA1-16     | Yes   | Yes  | RBD     | ARPPRNYDRSGYYQRAEYFQH     | 22    | IGHV1-46   | IGHD3-22 | IGHJ1 | IGKV1-33  | 32540902  |
| 3  | 2-36         | Yes   | Yes  | RBD     | AREVYYYDRSGYYASDGFDI      | 20    | IGHV4-61   | IGHD3-22 | IGHJ3 | IGKV3-20  | 34836485  |
| 4  | ADI-63338    | Yes*  | Yes* | RBD     | ARLLIYDRSGYYQTDFFDS       | 20    | IGHV4-39   | IGHD3-22 | IGHJ4 | IGLV6-57  | 33622975  |
| 5  | ADI-62104    | Yes*  | Yes* | RBD     | ARDQYYDRSGYRNGYFDY        | 21    | IGHV1-69   | IGHD3-22 | IGHJ4 | IGKV1-33  | 33622975  |
| 6  | C1463        | Yes   | N.D. | RBD     | ARQLYYDRSGFLHGDAFDI       | 20    | IGHV3-30-3 | IGHD3-22 | IGHJ3 | IGKV1-27  | 34619745  |
| 7  | C996         | Yes   | N.D. | RBD     | ARGQRYDRSGYYWGRAFDI       | 22    | IGHV3-13   | IGHD3-22 | IGHJ3 | IGLV3-21  | 34126625  |
| 8  | C634         | Yes   | N.D. | RBD     | ARSQYYDRSGYANHDADFID      | 20    | IGHV3-33   | IGHD3-22 | IGHJ3 | IGKV1-5   | 33567448  |
| 9  | C652         | Yes   | N.D. | RBD     | ARELYYDRSGYYPDDYAFDI      | 22    | IGHV3-33   | IGHD3-22 | IGHJ3 | IGKV1-5   | 33567448  |
| 10 | C868         | Yes   | N.D. | RBD     | ARETFPYDRTGHYKSDGFVDV     | 20    | IGHV4-61   | IGHD3-22 | IGHJ3 | IGKV1-5   | 34126625  |
| 11 | C1381        | Yes   | N.D. | RBD     | ARGPRGYDRTGHPYRNWYFEL     | 22    | IGHV3-13   | IGHD3-22 | IGHJ2 | IGLV2-14  | 34619745  |
| 12 | C022         | Yes   | Yes  | RBD     | ARHAAAYDRSGYFIEYFQH       | 21    | IGHV4-39   | IGHD3-22 | IGHJ1 | IGKV1-5   | 33948592  |
| 13 | ADI-57843    | Yes*  | No*  | RBD     | ARSTDYDRSGHYRIDADFID      | 20    | IGHV2-26   | IGHD3-22 | IGHJ3 | IGKV3D-20 | 33622975  |
| 14 | ADI-63164    | Yes*  | Yes* | RBD     | ARQPREFYDRIGFYHVENYFEK    | 22    | IGHV1-3    | IGHD3-22 | IGHJ4 | IGKV3-20  | 33622975  |
| 15 | P008_076     | Yes   | Yes  | Spike   | ARAHRGYDRSGYHNPDAFDI      | 22    | IGHV3-13   | IGHD3-22 | IGHJ3 | IGLV2-14  | 33836142  |
| 16 | ADI-62785    | Yes*  | No*  | RBD     | ARGTTPNYDRSGYRNAGDFDP     | 23    | IGHV4-39   | IGHD3-22 | IGHJ5 | IGLV1-40  | 33622975  |
| 17 | P054_003     | Yes   | No   | RBD     | ARVARHYDRSGNLHSADYFQH     | 22    | IGHV1-2    | IGHD3-22 | IGHJ1 | IGKV1-33  | 33836142  |
| 18 | MnC412p1_D10 | Yes   | N.D. | RBD     | ARGVNYDRNGYRNDGFDI        | 20    | IGHV4-39   | IGHD3-22 | IGHJ3 | IGKV1-17  | 32673567  |
| 19 | MnC412p1_A10 | Yes   | N.D. | RBD     | ARGVNYDRNGYRNDGFDI        | 20    | IGHV4-39   | IGHD3-22 | IGHJ3 | IGKV1-17  | 32673567  |
| 20 | MnC412p1_F5  | Yes   | N.D. | RBD     | ARGVNYDRNGYRNDGFDI        | 20    | IGHV4-39   | IGHD3-22 | IGHJ3 | IGKV1-17  | 32673567  |
| 21 | C1243        | Yes   | N.D. | RBD     | AKDGGPYDRSGYARDDYGMVDV    | 24    | IGHV3-30   | IGHD3-22 | IGHJ6 | IGLV1-40  | 34619745  |
| 22 | C1332        | Yes   | N.D. | RBD     | AKAPRGYDRSGYYRIQDNFDY     | 22    | IGHV3-30   | IGHD3-22 | IGHJ4 | IGKV1-13  | 34619745  |
| 23 | ADI-63219    | No*   |      | spike   | ARAVILLYDRGGFYGGETAADVCDV | 25    | IGHV1-18   | IGHD3-22 | IGHJ6 | IGKV3-20  | 33622975  |
| 24 | ADI-62969    | No*   |      | spike   | TPEGHYDRGGYQFGMDV         | 19    | IGHV3-30   | IGHD3-22 | IGHJ6 | IGKV2-30  | 33622975  |
| 25 | COVA2-47     | No    |      | Spike   | AKVATYYDRSGYYGGALDY       | 21    | IGHV3-9    | IGHD3-22 | IGHJ4 | IGKV4-1   | 32540902  |
| 26 | P008_082     | No    |      | RBD     | ARALENYDRNGYVGFADY        | 21    | IGHV1-18   | IGHD3-22 | IGHJ4 | IGKV3-20  | 33836142  |
| 27 | P008_093     | No    |      | RBD     | ARSKERGYRNRTGYYPGDWFDV    | 23    | IGHV1-8    | IGHD3-22 | IGHJ5 | IGKV3-11  | 33836142  |
| 28 | C83A5        | No    |      | RBD     | ARDGAYDRSAYYYRLKFFYDF     | 22    | IGHV3-33   | IGHD3-22 | IGHJ4 | IGLV3-25  | 34332650  |

Neut., neutralization against SARS-CoV-2; Cr., cross neutralization against both SARS-CoV-2 and SARS-CoV. Leng., amino acid length of CDR H3 as defined by IMGT scheme. YYDRxG antibodies tested against SARS-CoV-2 or SARS-CoV in previous publications or in this study are included in this table. \*neutralization data reported in this study. CDR H3 sequences, as well as heavy variable (IGHV), diversity (IGHD), joining (IGHJ) genes, and light chain variable genes (IGKV, IGLV) that encode these antibodies, are shown.

**Supplementary Table 2. YYDRxG antibodies against SARS-CoV-2 with only sequences available.**

|    | Ab name                     | CDR H3                     | Leng. | IGHV       | IGHD     | IHHJ  | PubMed ID |
|----|-----------------------------|----------------------------|-------|------------|----------|-------|-----------|
| 1  | COV021_P1_IgA_48-P1609      | AKAALRGYYDRSGYYEYNYGMDV    | 24    | IGHV3-30   | IGHD3-22 | IGHJ6 | 33288661  |
| 2  | COVD21_P2_HC_H11-p1369      | ARHAAAYDRSGYYFIEYFQH       | 21    | IGHV4-39   | IGHD3-22 | IGHJ1 | 33288661  |
| 3  | COV021_P3_IgA_29-P1609      | AKAALRGYYDRSGYYEYNYGMDV    | 24    | IGHV3-30   | IGHD3-22 | IGHJ6 | 33288661  |
| 4  | COVD21_P2_HC_H4-p1369       | ARQWRGYYDRSGYYHFDADF I     | 21    | IGHV5-51   | IGHD3-22 | IGHJ3 | 33288661  |
| 5  | COVD21_P3_HC_C11-p1369      | ARVGYYYDRSGFPRTEDYFDY      | 21    | IGHV1-69   | IGHD3-22 | IGHJ4 | 33288661  |
| 6  | COV047_P5_IgG_15-P1369      | ARYTYYYDRSGYYRPDYFDY       | 20    | IGHV1-69   | IGHD3-22 | IGHJ4 | 33288661  |
| 7  | COV047_P3_IgG_77-P1369      | ARVPRGYDRSGYYLPHYLDY       | 22    | IGHV1-18   | IGHD3-22 | IGHJ4 | 33288661  |
| 8  | COV096_HC_72-p1369          | ARRPRDYDRSGYYVPGYFDY       | 22    | IGHV1-18   | IGHD3-22 | IGHJ4 | 33288661  |
| 9  | COV107_Plate2_HC_47-P1369   | TRGSRGYYDRSGYYTLPDPYGMVDV  | 25    | IGHV3-21   | IGHD3-22 | IGHJ6 | 33288661  |
| 10 | MOD3_P1_IgG_C3-P1369        | ARDRGYFNRTGNYYVGRFDP       | 20    | IGHV3-33   | IGHD3-22 | IGHJ5 | 33567448  |
| 11 | Mod4_P3_IgG_H4-P1369        | AKDWSAYYDRSGYLRDLYYGMVDV   | 25    | IGHV3-23   | IGHD3-22 | IGHJ6 | 33567448  |
| 12 | Mod4_P3_IgG_H6-P1369        | ARPELGYDRSGYYREGEFFDY      | 22    | IGHV3-33   | IGHD3-22 | IGHJ4 | 33567448  |
| 13 | Mod4_P4_IgG_G8-P1369        | ARTLYYYDRSGYGGSDDAFDI      | 21    | IGHV3-74   | IGHD3-22 | IGHJ3 | 33567448  |
| 14 | MOD8_P2_IgG_H4-P1369        | ARQEHYYDRSGYPRSDYAFEI      | 21    | IGHV4-39   | IGHD3-22 | IGHJ3 | 33567448  |
| 15 | MOD8_P2_IgG_G11-P1369       | ARSQNYDRSGSLAEDAFDI        | 20    | IGHV3-33   | IGHD3-22 | IGHJ3 | 33567448  |
| 16 | MOD8_P2_IgG_B11-P1369       | ARSQNYDRSGYLAEDAFDI        | 20    | IGHV3-33   | IGHD3-22 | IGHJ3 | 33567448  |
| 17 | MOD8_P2_IgG_E11-P1369       | ARHEYYDRRGGYPRLGWFFD       | 20    | IGHV4-39   | IGHD3-22 | IGHJ5 | 33567448  |
| 18 | PZF12_P2_IgG_F7-P1369       | ARSPRGYDRTYGYHLEYYFDY      | 22    | IGHV3-30-3 | IGHD3-22 | IGHJ4 | 33567448  |
| 19 | C001_P2_IgG_F6-P1369        | ARDPFYYDRSGSPRGDAFDI       | 20    | IGHV3-33   | IGHD3-22 | IGHJ3 | 33567448  |
| 20 | C003_P1_IgG_C3-P1369        | ARETWYYDRSGYPRSDYFQY       | 21    | IGHV1-69   | IGHD3-22 | IGHJ1 | 33567448  |
| 21 | COV2-vax3                   | ARVVPNYYDRSGYYPGAFDI       | 20    | IGHV3-21   | IGHD3-22 | IGHJ3 | 34411541  |
| 22 | COVD21_mo6_HC_P2D12-p1369   | ARVPRDYDRTNHGHVDEYFQH      | 22    | IGHV3-74   | IGHD3-22 | IGHJ1 | 34126625  |
| 23 | COVD21_mo6_HC_P1F9-p1369    | ARESFYYDRSGYGSDAFDI        | 20    | IGHV4-61   | IGHD3-22 | IGHJ3 | 34126625  |
| 24 | COV21_1y_P1_IgG_A10-P1369   | ARETYYYDRSGYSSDGFYD        | 20    | IGHV4-61   | IGHD3-22 | IGHJ4 | 34126625  |
| 25 | COV21_1y_P1_IgG_C1-P1369    | ARETFYYDRTYGYSSDGFDF       | 20    | IGHV4-61   | IGHD3-22 | IGHJ4 | 34126625  |
| 26 | COVD47_mo6_P1_HC_B1-p1369   | ATELYYYDRSGYFQHWGDAFI      | 20    | IGHV4-39   | IGHD3-22 | IGHJ3 | 34126625  |
| 27 | COVD47_mo6_P1_HC_G7-p1369   | ARDMEVDYYDRSGHYHVFHAFDI    | 23    | IGHV3-30   | IGHD3-22 | IGHJ3 | 34126625  |
| 28 | COV47_1y_P2_IgG_B9-P1369    | ARRALGDYDRTYGYHRLGFDF      | 22    | IGHV5-51   | IGHD3-22 | IGHJ4 | 34126625  |
| 29 | COV47_1y_P1_IgG_G5-P1369    | ARRALGDYDRHGHFHRLGFDFY     | 22    | IGHV5-51   | IGHD3-22 | IGHJ4 | 34126625  |
| 30 | COV47_1y_P2_IgG_D12-P1369   | ARHERSYYDRSGYERRTLNDY      | 22    | IGHV5-10-1 | IGHD3-22 | IGHJ4 | 34126625  |
| 31 | COV47_1y_P2_IgG_B11-P1369   | AKEPRGYDRSGDYIILPDF        | 21    | IGHV3-23   | IGHD3-22 | IGHJ4 | 34126625  |
| 32 | COV57_1y_P2_IgG_A10-P1369   | ARGGRYYDRSGYKSDVDFDF       | 22    | IGHV1-3    | IGHD3-22 | IGHJ3 | 34126625  |
| 33 | COV57_1y_P2_IgG_E7-P1369    | ARGQRAYNRTGHWGWRALDI       | 22    | IGHV3-13   | IGHD3-22 | IGHJ3 | 34126625  |
| 34 | COV107_6mo_P1_IgG_F9-P1369  | ARPPRYYYDRSGYVVDYFDY       | 22    | IGHV5-10-1 | IGHD3-22 | IGHJ4 | 34126625  |
| 35 | COV107_6mo_P1_IgG_E11-P1369 | ARVPRGYDRSGYHGGDYFDY       | 22    | IGHV1-3    | IGHD3-22 | IGHJ4 | 34126625  |
| 36 | COV107_6mo_P1_IgG_B9-P1369  | ARLLHYYYDRSGYSGATDDAFDI    | 22    | IGHV5-51   | IGHD3-22 | IGHJ3 | 34126625  |
| 37 | COV134_6mo_P1_IgG_B2-P1369  | ARHSAHYYDRSGKGFHWGLHR      | 21    | IGHV4-39   | IGHD3-22 | IGHJ1 | 34126625  |
| 38 | COV134_6mo_P1_IgG_B6-P1369  | ARTPDYDRSGYLTQGSWDFP       | 21    | IGHV1-18   | IGHD3-22 | IGHJ5 | 34126625  |
| 39 | COV134_6mo_P1_IgG_H8-P1369  | ARDLYYYDRSGNYNLEEYFQ       | 21    | IGHV1-69   | IGHD3-22 | IGHJ1 | 34126625  |
| 40 | COV134_6mo_P1_IgG_D5-P1369  | ARGSANYYDRHGYYVASFLAN      | 22    | IGHV1-69   | IGHD3-22 | IGHJ4 | 34126625  |
| 41 | COV135_6m_P2_IgG_D9-P1369   | ARDVYYDRSGYLRDFDFN         | 19    | IGHV4-39   | IGHD3-22 | IGHJ4 | 34126625  |
| 42 | COV135_1y_P2_IgG_E9-P1369   | ARPPRDYYERSGYRFADYFQH      | 22    | IGHV3-7    | IGHD3-22 | IGHJ1 | 34126625  |
| 43 | COV135_1y_P2_IgG_F2-P1369   | AKVSSPNYYDRSGKRSERDAFDI    | 25    | IGHV3-23   | IGHD3-22 | IGHJ3 | 34126625  |
| 44 | COV325_1m_P3_IgG_C3-P1369   | TRDLRAYYYDRSGYVYVIGFDY     | 22    | IGHV1-46   | IGHD3-22 | IGHJ4 | 34126625  |
| 45 | COV325_6m_P2_IgG_H9-P1369   | ARASGINYYDRSGNYNVDYHYGMVDV | 26    | IGHV3-33   | IGHD3-22 | IGHJ6 | 34126625  |
| 46 | COV325_1y_P1_IgG_E7-P1369   | AREVYYDRRGGYKSEGFDH        | 20    | IGHV4-61   | IGHD3-22 | IGHJ4 | 34126625  |
| 47 | COV325_6m_P1_IgG_C11-P1369  | ARDHIASYYDRSGHYHYGMVDV     | 22    | IGHV1-69   | IGHD3-22 | IGHJ6 | 34126625  |
| 48 | COV539_1m_P3_IgG_F12-P1369  | ARRPRGYDRSGYIILEDFEY       | 22    | IGHV3-33   | IGHD3-22 | IGHJ4 | 34126625  |
| 49 | COV539_1m_P2_IgG_C7-P1369   | ARHEYYDRRGGYRGLWDFD        | 20    | IGHV4-39   | IGHD3-22 | IGHJ5 | 34126625  |
| 50 | COV539_6m_P2_IgG_C10-P1369  | ARRPRGYDRSGFYNVEDYFDY      | 22    | IGHV3-33   | IGHD3-22 | IGHJ4 | 34126625  |
| 51 | C006_mo6_HC_P4D5-1369       | ARAGRDDYDRSGYHGHDAFDI      | 21    | IGHV3-53   | IGHD3-22 | IGHJ3 | 34619745  |
| 52 | C012_V1_P1_IgG_E1-P1369     | ARSPRGYDRSGYLNLLWYFDY      | 22    | IGHV3-33   | IGHD3-22 | IGHJ4 | 34619745  |
| 53 | C012_VAX2_HC_P1C11-1369     | AREPRDYDRSGYHRLHFHYFEY     | 22    | IGHV3-48   | IGHD3-22 | IGHJ4 | 34619745  |
| 54 | C012_mo6_HC_P4A3-1369       | ARRPRGYDRSGYHHSIGYMDV      | 22    | IGHV3-30   | IGHD3-22 | IGHJ6 | 34619745  |
| 55 | C012_mo6_HC_P3H8-1369       | ARRPRGYDRSGYHHSIGYMDV      | 22    | IGHV3-30   | IGHD3-22 | IGHJ6 | 34619745  |
| 56 | C012_mo6_HC_P3E12-1369      | ARRPRGYDRSGYHHSIGYMDV      | 22    | IGHV3-30   | IGHD3-22 | IGHJ6 | 34619745  |
| 57 | C012_mo6_HC_P3G1-1369       | ARRPRGYDRSGYHHSIGYMDV      | 22    | IGHV3-30   | IGHD3-22 | IGHJ6 | 34619745  |
| 58 | C012_mo6_HC_P1E5-1369       | ARRPRGYDRSGYHHSIGYMDV      | 22    | IGHV3-30   | IGHD3-22 | IGHJ6 | 34619745  |
| 59 | C012_mo6_HC_P1E7-1369       | ARVNYYDRSGQPTLDDIFINI      | 21    | IGHV1-69   | IGHD3-22 | IGHJ3 | 34619745  |
| 60 | C012_mo6_HC_P2B2-1369       | ARFGAYYDRTYGKKEFYFQH       | 20    | IGHV5-51   | IGHD3-22 | IGHJ1 | 34619745  |
| 61 | C016_mo6_HC_P2F10-1369      | ARRPRGYDRSGYHHSIGYMDV      | 22    | IGHV3-30   | IGHD3-22 | IGHJ6 | 34619745  |
| 62 | C016_mo6_HC_P1B9-1369       | ARRPRGYDRSGYHHSIGYMDV      | 22    | IGHV3-30   | IGHD3-22 | IGHJ6 | 34619745  |
| 63 | C016_mo6_HC_P1C2-1369       | ARALCYDRSGNYLTEDYFDH       | 21    | IGHV1-3    | IGHD3-22 | IGHJ4 | 34619745  |
| 64 | C017_Vax2_HC_P2H8-1369      | ASCRIYYDRSGYQAPEDYFDY      | 21    | IGHV1-69   | IGHD3-22 | IGHJ4 | 34619745  |
| 65 | C003_6m_P1_IgG_H7-P1369     | AKVGYVDRNGSPRDENYYYGMVDV   | 25    | IGHV3-30   | IGHD3-22 | IGHJ6 | 34619745  |
| 66 | C003_6m_P3_IgG_H6-P1369     | ARDVPLYDRSGNYGLAEYFQY      | 22    | IGHV1-18   | IGHD3-22 | IGHJ1 | 34619745  |
| 67 | C003_6m_P3_IgG_C12-P1369    | ARSPRDYDRRGGYLVVERWFFD     | 22    | IGHV4-59   | IGHD3-22 | IGHJ5 | 34619745  |
| 68 | C003_mo6_HC_P7A9-1369       | ARRPRGYDRSGYHHSIGYMDV      | 22    | IGHV3-30   | IGHD3-22 | IGHJ6 | 34619745  |
| 69 | C004_mo6_HC_P4E5-1369       | ARAGRDDYDRSGYHGHDAFDI      | 21    | IGHV3-53   | IGHD3-22 | IGHJ3 | 34619745  |
| 70 | C004_mo6_HC_P4A3-1369       | ARRPRGYDRSGYHHSIGYMDV      | 22    | IGHV3-30   | IGHD3-22 | IGHJ6 | 34619745  |
| 71 | C004_mo6_HC_P3F4-1369       | ARRPRGYDRSGYHHSIGYMDV      | 22    | IGHV3-30   | IGHD3-22 | IGHJ6 | 34619745  |
| 72 | C004_mo6_HC_P4F5-1369       | ARRPRGYDRSGYHHSIGYMDV      | 22    | IGHV3-30   | IGHD3-22 | IGHJ6 | 34619745  |

YYDRxG antibodies against SARS-CoV-2 with no available antigen binding or neutralization data are included in this table. CDR H3 sequences, as well as heavy variable (IGHV), diversity (IGHD), and joining (IGHJ) genes that encode these antibodies, are shown.

**Supplementary Table 3. YYDRxG antibodies sequenced from COVID-19 patients and vaccinees.**

|    | Patient ID | Sequence analyzed | YYDRxG found | Patient group         |
|----|------------|-------------------|--------------|-----------------------|
| 1  | COV021     | 1689              | 11           | Infection             |
| 2  | COV047     | 1346              | 8            | Infection             |
| 3  | COV072     | 1031              | 0            | Infection             |
| 4  | COV107     | 1376              | 4            | Infection             |
| 5  | COV057     | 739               | 3            | Infection+vaccination |
| 6  | COV096     | 1331              | 1            | Infection+vaccination |
| 7  | COV134     | 515               | 4            | Infection+vaccination |
| 8  | COV135     | 531               | 3            | Infection+vaccination |
| 9  | COV325     | 708               | 4            | Infection+vaccination |
| 10 | COV539     | 778               | 3            | Infection+vaccination |
| 11 | C001       | 556               | 1            | Vaccination           |
| 12 | C003       | 536               | 6            | Vaccination           |
| 13 | C004       | 592               | 5            | Vaccination           |
| 14 | C005       | 215               | 1            | Vaccination           |
| 15 | C006       | 326               | 1            | Vaccination           |
| 16 | C011       | 526               | 0            | Vaccination           |
| 17 | C012       | 683               | 9            | Vaccination           |
| 18 | C016       | 742               | 3            | Vaccination           |
| 19 | C017       | 421               | 1            | Vaccination           |
| 20 | C030       | 224               | 1            | Vaccination           |
| 21 | C034       | 343               | 0            | Vaccination           |
| 22 | MOD1       | 136               | 0            | Vaccination           |
| 23 | MOD11      | 218               | 0            | Vaccination           |
| 24 | MOD2       | 89                | 1            | Vaccination           |
| 25 | MOD3       | 233               | 2            | Vaccination           |
| 26 | MOD4       | 245               | 3            | Vaccination           |
| 27 | MOD6       | 220               | 0            | Vaccination           |
| 28 | MOD7       | 218               | 0            | Vaccination           |
| 29 | MOD8       | 288               | 4            | Vaccination           |
| 30 | MOD9       | 203               | 0            | Vaccination           |
| 31 | PZF10      | 263               | 0            | Vaccination           |
| 32 | PZF12      | 180               | 1            | Vaccination           |

A YYDRxG pattern search was used to identify antibody sequences in previously reported cohorts<sup>2-7</sup>. Number of all antibody sequences analyzed and YYDRxG antibodies identified in each patient were counted and used for analysis in Fig. 6a.

## Supplementary References

- 1 Adams, P. D. *et al.* PHENIX: a comprehensive Python-based system for macromolecular structure solution. *Acta Crystallogr D* **66**, 213-221 (2010).
- 2 Cho, A. *et al.* Anti-SARS-CoV-2 receptor-binding domain antibody evolution after mRNA vaccination. *Nature* **600**, 517-522 (2021).
- 3 Wang, Z. *et al.* Enhanced SARS-CoV-2 neutralization by dimeric IgA. *Sci Transl Med* **13**, eabf1555 (2021).
- 4 Wang, Z. *et al.* mRNA vaccine-elicited antibodies to SARS-CoV-2 and circulating variants. *Nature* **592**, 616-622 (2021).
- 5 Wang, Z. *et al.* Naturally enhanced neutralizing breadth against SARS-CoV-2 one year after infection. *Nature* **595**, 426-431 (2021).
- 6 Gaebler, C. *et al.* Evolution of antibody immunity to SARS-CoV-2. *Nature* **591**, 639-644 (2021).
- 7 Robbiani, D. F. *et al.* Convergent antibody responses to SARS-CoV-2 in convalescent individuals. *Nature* **584**, 437-442 (2020).
