# Supplementary material
Source: PubMed Central journal article supplement (PMC9338025)
Supplement: 42003_2022_3700_MOESM2_ESM.pdf [file 42003_2022_3700_MOESM2_ESM.pdf]

## Description of Additional Supplementary Files

**File name:** Supplementary Data 1

**Description:** Amino acid sequence alignment of sarbecovirus RBDs.

**File name:** Supplementary Data 2

**Description:** The source data behind the graphs in the paper.
